# Supplementary material for: A Novel Clustering Methodology Based on Modularity Optimisation for Detecting Authorship Affinities in Shakespearean Era Plays
Source: PLoS One. 2016 Aug 29;11(8):e0157988. doi: 10.1371/journal.pone.0157988 (PMC5003342; doi:10.1371/journal.pone.0157988)
Supplement: S4 Table — (XLSX) [file pone.0157988.s004.xlsx]

## Sheet: Clusters
Cluster 1	Cluster 2	Cluster 3	Cluster 4	Cluster 5	Cluster 6	Cluster 7
Hamlet.Shakespeare	Michaelmas Term.Middleton	May Day.Chapman	The Chances.Fletcher	Sejanus.Jonson	Sapho and Phao.Lyly	Fancies.Ford
Much Ado about Nothing.Shakespeare	Second Maiden's Tragedy.Middleton	Gentleman Usher.Chapman	Pilgrim.Fletcher	Bussy D'Ambois.Chapman	Endimion.Lyly	Lady's Trial.Ford
King John.Shakespeare	Yorkshire Tragedy.Middleton	Tale of a Tub.Jonson	Wit Without Money.Fletcher	Byron's Tragedy.Chapman	Midas.Lyly	Broken Heart.Ford
Tempest.Shakespeare	Widow.Middleton	Widow's Tears.Chapman	Woman's Prize.Fletcher	Catiline.Jonson	Love's Metamorphosis.Lyly	Love's Sacrifice.Ford
Henry IV Part 1.Shakespeare	Revenger's Tragedy.Middleton	Poetaster.Jonson	Loyal Subject.Fletcher	Caesar and Pompey.Chapman	Gallathea.Lyly	Lover's Melancholy.Ford
Richard II.Shakespeare	Women Beware Women.Middleton	Monsieur d'Olive.Chapman	Wife for a Month.Fletcher	Revenge of Bussy.Chapman	Mother Bombie.Lyly	Tis Pity She's a Whore.Ford
Julius Caesar.Shakespeare	Phoenix.Middleton	Bartholomew Fair.Jonson	Bonduca.Fletcher	Byron's Conspiracy.Chapman	Campaspe.Lyly	Perkin Warbeck.Ford
Midsummer Night's Dream.Shakespeare	More Dissemblers.Middleton	Alchemist.Jonson	Wild Goose Chase.Fletcher
Two Gentlemen of Verona.Shakespeare	Mad World.Middleton	Every Man in his Humour.Jonson	Women Pleased.Fletcher
Merchant of Venice.Shakespeare	Five Gallants.Middleton	All Fools.Chapman	Valentinian.Fletcher
Troilus and Cressida.Shakespeare	Chaste Maid in Cheapside.Middleton	Case is Altered.Jonson	Island Princess.Fletcher
As You Like It.Shakespeare	Hengist.Middleton	Every Man out of his Humour.Jonson	Humorous Lieutenant.Fletcher
Antony and Cleopatra.Shakespeare	Witch validated.Middleton	Cynthia's Revels.Jonson	Monsieur Thomas.Fletcher
Merry Wives.Shakespeare	No Wit.Middleton	New Inn.Jonson	Mad Lover.Fletcher
Woman in the Moon.Lyly	Game at Chess.Middleton	Volpone.Jonson
Blind Beggar of Alexandria.Chapman	Puritan.Middleton	Humorous Day's Mirth.Chapman
Cymbeline.Shakespeare	Nice Valour.Middleton	Staple of News.Jonson
Othello.Shakespeare	Trick to Catch the Old One.Middleton	Magnetic Lady.Jonson
Comedy of Errors.Shakespeare		Sad Shepherd.Jonson
Taming of the Shrew.Shakespeare		Devil is an Ass.Jonson
Romeo and Juliet.Shakespeare		Sir Giles Goosecap.Chapman
Faithful Shepherdess.Fletcher		Epicoene.Jonson
Henry V.Shakespeare
Twelfth Night.Shakespeare
Winter's Tale.Shakespeare
Love's Labour's Lost.Shakespeare
King Lear.Shakespeare
Coriolanus.Shakespeare
Henry IV Part 2.Shakespeare
Richard III.Shakespeare
All's Well.Shakespeare

## Sheet: All plays in G5
Id	Label	Play	Author	Genre	Cluster label
1	All Fools.Chapman	All Fools	Chapman	Comedy	3
2	Blind Beggar of Alexandria.Chapman	Blind Beggar of Alexandria	Chapman	Comedy	1
3	Bussy D'Ambois.Chapman	Bussy D'Ambois	Chapman	Tragedy	5
4	Byron's Conspiracy.Chapman	Byron's Conspiracy	Chapman	Tragedy	5
5	Byron's Tragedy.Chapman	Byron's Tragedy	Chapman	Tragedy	5
6	Caesar and Pompey.Chapman	Caesar and Pompey	Chapman	History	5
7	Gentleman Usher.Chapman	Gentleman Usher	Chapman	Comedy	3
8	Humorous Day's Mirth.Chapman	Humorous Day's Mirth	Chapman	Comedy	3
9	May Day.Chapman	May Day	Chapman	Comedy	3
10	Monsieur d'Olive.Chapman	Monsieur d'Olive	Chapman	Comedy	3
11	Revenge of Bussy.Chapman	Revenge of Bussy	Chapman	Tragedy	5
12	Sir Giles Goosecap.Chapman	Sir Giles Goosecap	Chapman	Comedy	3
13	Widow's Tears.Chapman	Widow's Tears	Chapman	Comedy	3
14	Bonduca.Fletcher	Bonduca	Fletcher	Tragedy	4
15	Faithful Shepherdess.Fletcher	Faithful Shepherdess	Fletcher	Pastoral	1
16	Humorous Lieutenant.Fletcher	Humorous Lieutenant	Fletcher	Tragicomedy	4
17	Island Princess.Fletcher	Island Princess	Fletcher	Tragicomedy	4
18	Loyal Subject.Fletcher	Loyal Subject	Fletcher	Tragicomedy	4
19	Mad Lover.Fletcher	Mad Lover	Fletcher	Tragicomedy	4
20	Monsieur Thomas.Fletcher	Monsieur Thomas	Fletcher	Comedy	4
21	Pilgrim.Fletcher	Pilgrim	Fletcher	Comedy	4
22	The Chances.Fletcher	The Chances	Fletcher	Comedy	4
23	Valentinian.Fletcher	Valentinian	Fletcher	Tragedy	4
24	Wife for a Month.Fletcher	Wife for a Month	Fletcher	Tragicomedy	4
25	Wild Goose Chase.Fletcher	Wild Goose Chase	Fletcher	Comedy	4
26	Wit Without Money.Fletcher	Wit Without Money	Fletcher	Comedy	4
27	Woman's Prize.Fletcher	Woman's Prize	Fletcher	Comedy	4
28	Women Pleased.Fletcher	Women Pleased	Fletcher	Tragicomedy	4
29	Broken Heart.Ford	Broken Heart	Ford	Tragedy	7
30	Fancies.Ford	Fancies	Ford	Comedy	7
31	Lady's Trial.Ford	Lady's Trial	Ford	Comedy	7
32	Love's Sacrifice.Ford	Love's Sacrifice	Ford	Tragedy	7
33	Lover's Melancholy.Ford	Lover's Melancholy	Ford	Tragicomedy	7
34	Perkin Warbeck.Ford	Perkin Warbeck	Ford	History	7
35	Tis Pity She's a Whore.Ford	Tis Pity She's a Whore	Ford	Tragedy	7
36	Alchemist.Jonson	Alchemist	Jonson	Comedy	3
37	Bartholomew Fair.Jonson	Bartholomew Fair	Jonson	Comedy	3
38	Case is Altered.Jonson	Case is Altered	Jonson	Comedy	3
39	Catiline.Jonson	Catiline	Jonson	Tragedy	5
40	Cynthia's Revels.Jonson	Cynthia's Revels	Jonson	Comedy	3
41	Devil is an Ass.Jonson	Devil is an Ass	Jonson	Comedy	3
42	Epicoene.Jonson	Epicoene	Jonson	Comedy	3
43	Every Man in his Humour.Jonson	Every Man in his Humour	Jonson	Comedy	3
44	Every Man out of his Humour.Jonson	Every Man out of his Humour	Jonson	Comedy	3
45	Magnetic Lady.Jonson	Magnetic Lady	Jonson	Comedy	3
46	New Inn.Jonson	New Inn	Jonson	Comedy	3
47	Poetaster.Jonson	Poetaster	Jonson	Comedy	3
48	Sad Shepherd.Jonson	Sad Shepherd	Jonson	Pastoral	3
49	Sejanus.Jonson	Sejanus	Jonson	Tragedy	5
50	Staple of News.Jonson	Staple of News	Jonson	Comedy	3
51	Tale of a Tub.Jonson	Tale of a Tub	Jonson	Comedy	3
52	Volpone.Jonson	Volpone	Jonson	Comedy	3
53	Campaspe.Lyly	Campaspe	Lyly	Comedy	6
54	Endimion.Lyly	Endimion	Lyly	Comedy	6
55	Gallathea.Lyly	Gallathea	Lyly	Comedy	6
56	Love's Metamorphosis.Lyly	Love's Metamorphosis	Lyly	Pastoral	6
57	Midas.Lyly	Midas	Lyly	Comedy	6
58	Mother Bombie.Lyly	Mother Bombie	Lyly	Comedy	6
59	Sapho and Phao.Lyly	Sapho and Phao	Lyly	Comedy	6
60	Woman in the Moon.Lyly	Woman in the Moon	Lyly	Comedy	1
61	Chaste Maid in Cheapside.Middleton	Chaste Maid in Cheapside	Middleton	Comedy	2
62	Five Gallants.Middleton	Five Gallants	Middleton	Comedy	2
63	Game at Chess.Middleton	Game at Chess	Middleton	History	2
64	Hengist.Middleton	Hengist	Middleton	Tragedy	2
65	Mad World.Middleton	Mad World	Middleton	Comedy	2
66	Michaelmas Term.Middleton	Michaelmas Term	Middleton	Comedy	2
67	More Dissemblers.Middleton	More Dissemblers	Middleton	Comedy	2
68	Nice Valour.Middleton	Nice Valour	Middleton	Comedy	2
69	No Wit.Middleton	No Wit	Middleton	Comedy	2
70	Phoenix.Middleton	Phoenix	Middleton	Comedy	2
71	Puritan.Middleton	Puritan	Middleton	Comedy	2
72	Revenger's Tragedy.Middleton	Revenger's Tragedy	Middleton	tragedy	2
73	Second Maiden's Tragedy.Middleton	Second Maiden's Tragedy	Middleton	Tragedy	2
74	Trick to Catch the Old One.Middleton	Trick to Catch the Old One	Middleton	Comedy	2
75	Widow.Middleton	Widow	Middleton	Comedy	2
76	Witch validated.Middleton	Witch validated	Middleton	Tragicomedy	2
77	Women Beware Women.Middleton	Women Beware Women	Middleton	Tragedy	2
78	Yorkshire Tragedy.Middleton	Yorkshire Tragedy	Middleton	tragedy	2
79	All's Well.Shakespeare	All's Well	Shakespeare	Comedy	1
80	Antony and Cleopatra.Shakespeare	Antony and Cleopatra	Shakespeare	Tragedy	1
81	As You Like It.Shakespeare	As You Like It	Shakespeare	Comedy	1
82	Comedy of Errors.Shakespeare	Comedy of Errors	Shakespeare	Comedy	1
83	Coriolanus.Shakespeare	Coriolanus	Shakespeare	Tragedy	1
84	Cymbeline.Shakespeare	Cymbeline	Shakespeare	Tragedy	1
85	Hamlet.Shakespeare	Hamlet	Shakespeare	Tragedy	1
86	Henry IV Part 1.Shakespeare	Henry IV Part 1	Shakespeare	History	1
87	Henry IV Part 2.Shakespeare	Henry IV Part 2	Shakespeare	History	1
88	Henry V.Shakespeare	Henry V	Shakespeare	History	1
89	Julius Caesar.Shakespeare	Julius Caesar	Shakespeare	Tragedy	1
90	King John.Shakespeare	King John	Shakespeare	History	1
91	King Lear.Shakespeare	King Lear	Shakespeare	Tragedy	1
92	Love's Labour's Lost.Shakespeare	Love's Labour's Lost	Shakespeare	Comedy	1
93	Merchant of Venice.Shakespeare	Merchant of Venice	Shakespeare	Comedy	1
94	Merry Wives.Shakespeare	Merry Wives	Shakespeare	Comedy	1
95	Midsummer Night's Dream.Shakespeare	Midsummer Night's Dream	Shakespeare	Comedy	1
96	Much Ado about Nothing.Shakespeare	Much Ado about Nothing	Shakespeare	Comedy	1
97	Othello.Shakespeare	Othello	Shakespeare	tragedy	1
98	Richard II.Shakespeare	Richard II	Shakespeare	History	1
99	Richard III.Shakespeare	Richard III	Shakespeare	History	1
100	Romeo and Juliet.Shakespeare	Romeo and Juliet	Shakespeare	Tragedy	1
101	Taming of the Shrew.Shakespeare	Taming of the Shrew	Shakespeare	Comedy	1
102	Tempest.Shakespeare	Tempest	Shakespeare	Comedy	1
103	Troilus and Cressida.Shakespeare	Troilus and Cressida	Shakespeare	Tragedy	1
104	Twelfth Night.Shakespeare	Twelfth Night	Shakespeare	Comedy	1
105	Two Gentlemen of Verona.Shakespeare	Two Gentlemen of Verona	Shakespeare	Comedy	1
106	Winter's Tale.Shakespeare	Winter's Tale	Shakespeare	Tragicomedy	1
